# Supplementary material for: Bioderived ionic liquid-based pretreatment enhances methane production from Agave tequilana bagasse
Source: Royal Society of Chemistry journal article supplement (doi:10.1039/d0ra01849j), 2020-01-01

**ELECTRONIC SUPPORTING INFORMATION (ESI)**

**BIONIC LIQUID-BASED PRETREATMENT ENHANCES METHANE**

**PRODUCTION FROM *AGAVE TEQUILANA* BAGASSE**

Jose A. Pérez-Pimienta<sup>a</sup>, José P. A. Icaza-Herrera<sup>b</sup>, Hugo O. Méndez-Acosta<sup>b</sup>, Víctor González-Álvarez<sup>b</sup>, Jorge A. Méndez-Pérez<sup>c</sup>, Jorge Arreola-Vargas<sup>d,\*</sup>

<sup>a</sup> Department of Chemical Engineering, Universidad Autónoma de Nayarit, Tepic, Mexico

<sup>b</sup> Departamento de Ingeniería Química, CUCEI-Universidad de Guadalajara, Guadalajara, Jalisco, México.

<sup>c</sup> Department of Engineering in Environmental Systems, Instituto Politécnico Nacional, Mexico City, Mexico

<sup>d</sup> División de Procesos Industriales, Universidad Tecnológica de Jalisco, Guadalajara, Jalisco, México.

\*Corresponding author.

E-mail address: [jorgearreolav85@gmail.com](mailto:jorgearreolav85@gmail.com)

## ELECTRONIC SUPPORTING INFORMATION (ESI)

**Table S1.** Relative changes in ATB after IL pretreatment.

| <b>Band</b> | <b>Assignment</b>                                                             | <b>% Relative<br/>change</b> |
|-------------|-------------------------------------------------------------------------------|------------------------------|
| 900         | Anti-symmetric out of plane ring stretch of<br>amorphous cellulose            | -2.1                         |
| 1027        | C-O stretching in cellulose & hemicellulose                                   | 3.2                          |
| 1235        | C-O stretching in lignin & hemicellulose                                      | 48.1                         |
| 1321        | C=O stretching of calcium oxalate                                             | 13.8                         |
| 1375        | C-H deformation in cellulose & hemicellulose                                  | 13.9                         |
| 1622        | C-O stretching of calcium oxalate                                             | 42.9                         |
| 1745        | Carbonyl (C=O) stretching                                                     | 68.1                         |
| 2900        | C-H stretching (related to rupture of<br>methyl/methylene group of cellulose) | -18.5                        |
| 3348        | O-H stretching (indicates rupture of cellulose<br>hydrogen bonds)             | -6.8                         |

%Relative change =  $100 * [(intensity\ of\ untreated\ solids - intensity\ of\ pretreated\ solids) / intensity\ of\ untreated\ solids]$ ; where positive numbers indicate reduction

## ELECTRONIC SUPPORTING INFORMATION (ESI)

**Table S2.** Elemental content from calcium oxalate crystals in untreated and [Ch][Lys] pretreated ATB.

| <b>Sample</b>        | <b>Element</b> | <b>% Mass fraction</b> | <b>% Atomic mass fraction</b> |
|----------------------|----------------|------------------------|-------------------------------|
| <b>Untreated ATB</b> | C              | 10.8                   | 18.0                          |
|                      | O              | 50.3                   | 62.7                          |
|                      | Ca             | 38.9                   | 19.3                          |
| <b>[Ch][Lys]-ATB</b> | C              | 13.5                   | 23.0                          |
|                      | O              | 42.9                   | 54.8                          |
|                      | Ca             | 43.6                   | 22.2                          |

## ELECTRONIC SUPPORTING INFORMATION (ESI)

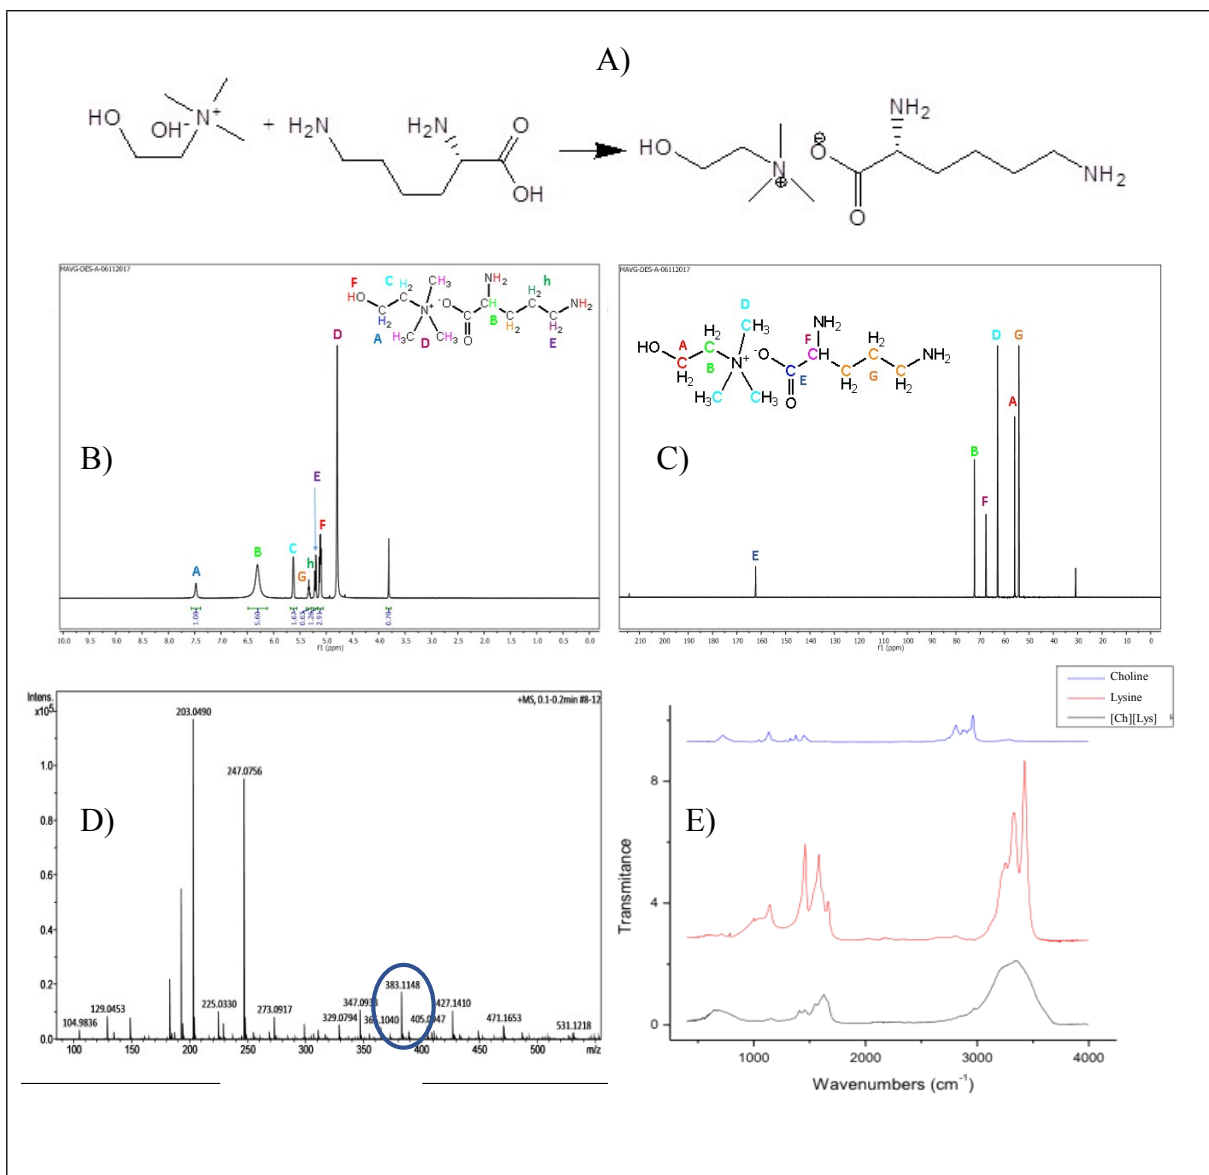

**Fig. S1.** A) Overall reaction to synthesize [Ch][Lys]\*, B)  $^1\text{H}$ -NMR spectra of [Ch][Lys] in  $\text{D}_2\text{O}$ , C)  $^{13}\text{C}$ -NMR spectra of [Ch][Lys] in  $\text{D}_2\text{O}$ , D) Mass spectra of [Ch][Lys], and E) FTIR spectra of [Ch][Lys] and components.

\*Synthesis was carried out according to Sun et al., *Green Chem.*, 2014, **16**, 2546–2557.

ELECTRONIC SUPPORTING INFORMATION (ESI)

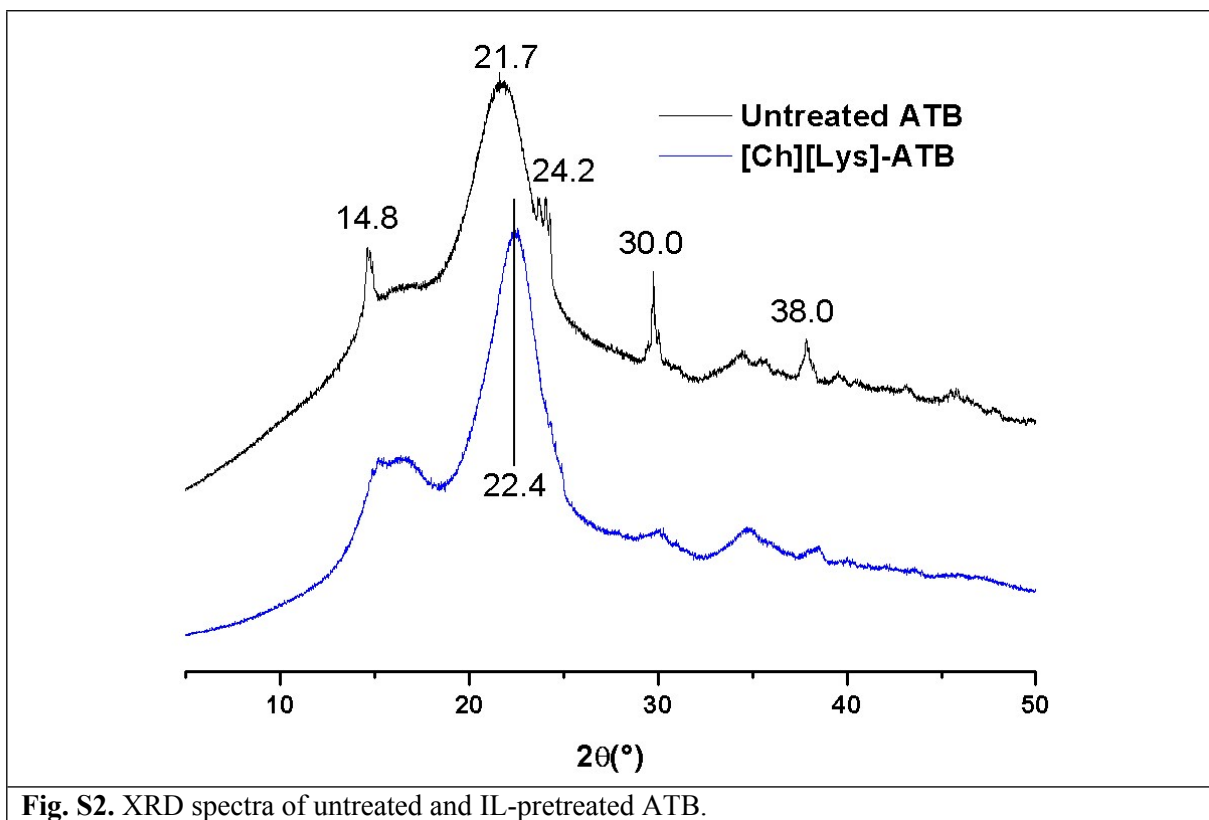

Fig. S2. XRD spectra of untreated and IL-pretreated ATB.

## ELECTRONIC SUPPORTING INFORMATION (ESI)

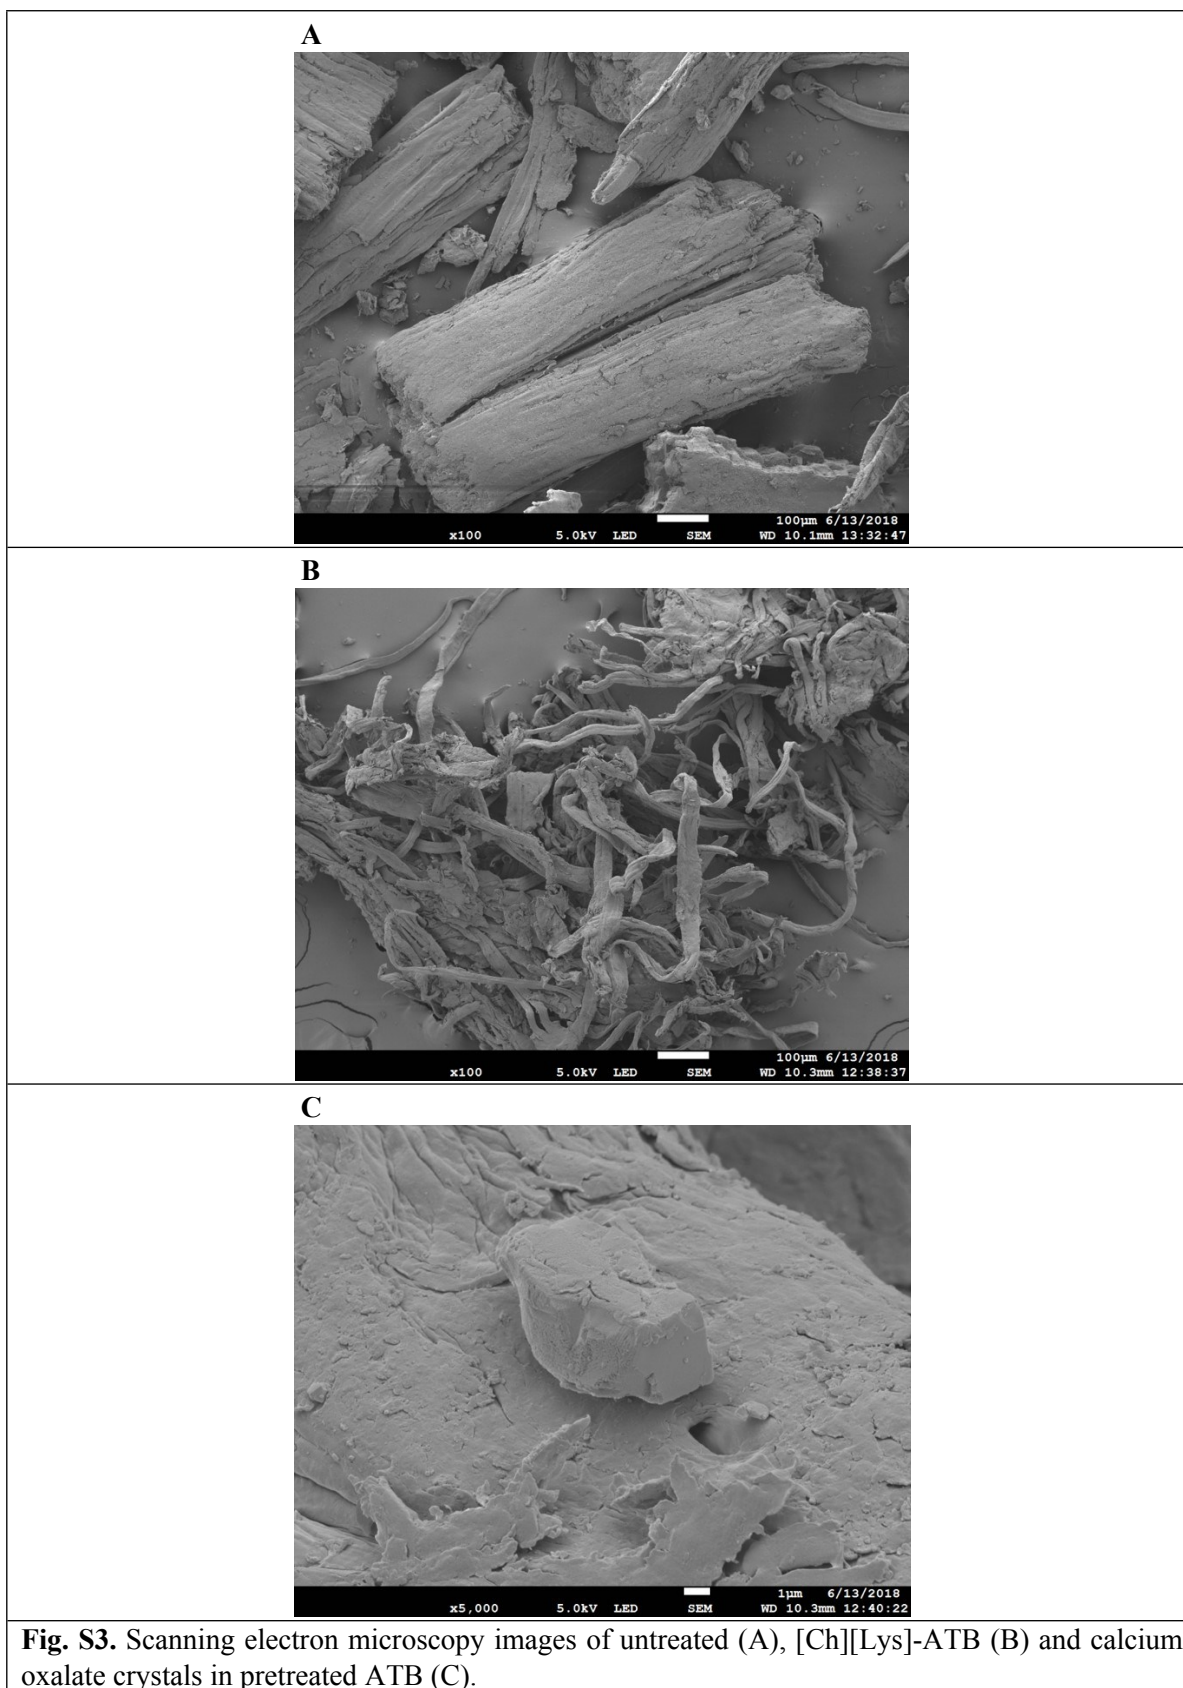

## ELECTRONIC SUPPORTING INFORMATION (ESI)

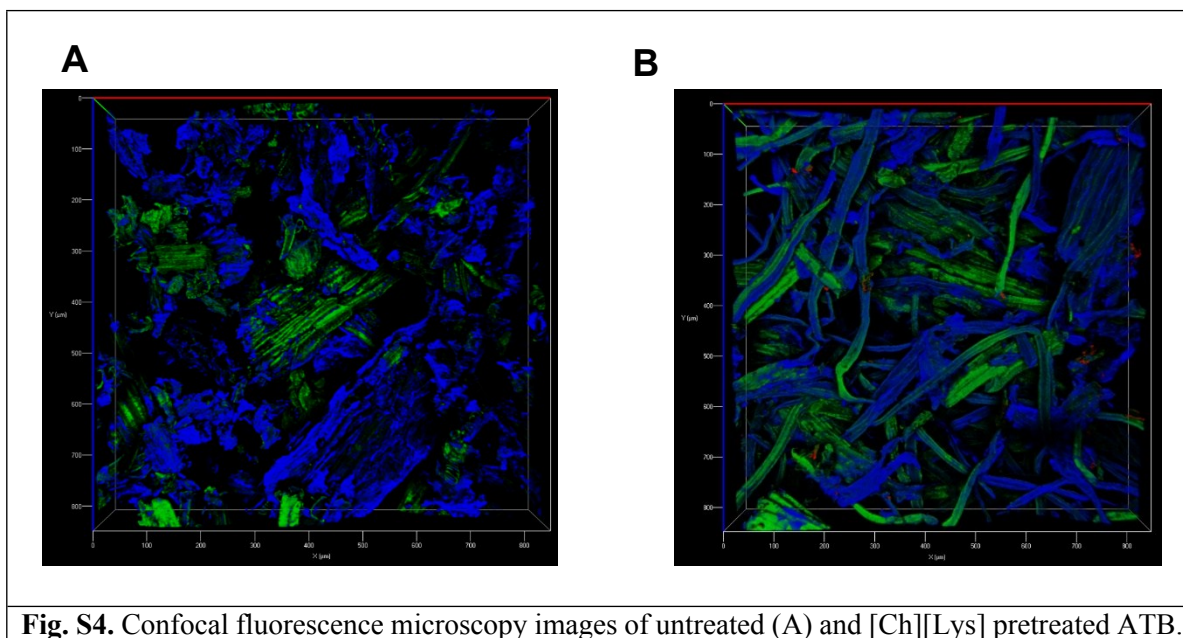

Supplement: d0ra01849j1.pdf [file d0ra01849j1.pdf]
